# Supplementary material for: Perinatal High-Salt Diet Induces Gut Microbiota Dysbiosis, Bile Acid Homeostasis Disbalance, and NAFLD in Weanling Mice Offspring
Source: MDPI journal article supplement (doi:10.3390/nu13072135), 2021-06-22
Supplement: s1 [file s1]

Table S1. The compositions and formulas of normal diet and high salt diet

| Class description | Ingredient (g/kg Diet) | Normal Diet |             | High Salt Diet |             |
|-------------------|------------------------|-------------|-------------|----------------|-------------|
|                   |                        | g           | Kcal        | g              | Kcal        |
| Protein           | Casein,30 mesh         | 200         | 800         | 200            | 800         |
| Protein           | L-cystine              | 3           | 12          | 3              | 12          |
| Carbohydrate      | Corn Starch            | 397         | 1589        | 397            | 1589        |
| Carbohydrate      | Maltodextrin 10        | 132         | 528         | 132            | 528         |
| Carbohydrate      | Sucrose                | 100         | 400         | 100            | 400         |
| Fiber             | Cellulose              | 50          | 0           | 50             | 0           |
| Fat               | Soybean Oil            | 70          | 630         | 70             | 630         |
| Anti-oxidant      | t-butylhydroquinone    | 0.014       | 0           | 0.014          | 0           |
| Mineral           | Mineral Mix S10022G    | 35          | 0           | 35             | 0           |
| Vitamin           | Vitamin Mix V10037     | 10          | 40          | 10             | 40          |
| Vitamin           | Choline Bitartrate     | 2.5         | 0           | 2.5            | 0           |
|                   | Sodium Chloride        | 0           | 0           | 39.98          | 0           |
| Total             |                        | 999.514     | 3999        | 1039.49        | 3999        |
| Component         |                        | g (%)       | Calorie (%) | g (%)          | Calorie (%) |
| Protein           |                        | 20          | 20          |                | 20          |
| Carbohydrate      |                        | 63          | 63          |                | 63          |
| Fat               |                        | 7           | 16          |                | 16          |

Table S2. Primer sequences.

| Gene    | Accession Number               | Sequences                                                          |
|---------|--------------------------------|--------------------------------------------------------------------|
| Cyp7a1  | <a href="#">NM_007824.3</a>    | F-5'-tgatcctctgggcatctcaagca-3'<br>R-5'-agctcttgccagcactctgtaat-3' |
| Gapdh   | <a href="#">NM_008084.3</a>    | F-5'-accagaagactgtggatgg-3'<br>R-5'-cagtgaagctcccgttcag-3'         |
| Srebp1c | <a href="#">NM_001358314.1</a> | F-5'-ggagccatggattgcacatt-3'<br>R-5'-gcttcagagaggaggccag-3'        |
| Fas     | <a href="#">NM_007988.3</a>    | F-5'-aagttcccagtcagagaacc-3'<br>R-5'-atccatagagccagccttcac-3'      |
| ACC     | <a href="#">NM_133360.2</a>    | F-5'-aacatccccacgtaaacag-3'<br>R-5'-ctgacaaggtggcgtgaag-3'         |
| Il6     | <a href="#">NM_001314054.1</a> | F-5'-tgatggatgctacaaactgga-3'<br>R-5'-tgtgactccagcttatctcttg-3'    |
| Tnf     | <a href="#">NM_013693.3</a>    | F-5'-tagccacgtcgtagcaaac-3'<br>R-5'-acaaggtacaacccatcggc-3'        |
| Ocln    | <a href="#">NM_008756.2</a>    | F-5'-ttgaactgtgattggcagc-3'<br>R-5'-caagataagcgaaccttggcg-3'       |
| Tjp1    | <a href="#">NM_009386.2</a>    | F-5'-gatgtttatgaggacggtgg-3'<br>R-5'-cattgctgtgctcttagcgg-3'       |
| Nr0b2   | <a href="#">NM_011850.3</a>    | F-5'-tcctctcaaccagatgtgc-3'<br>R-5'-agacttcacacagtgccag-3'         |
| Nr1h4   | <a href="#">NM_001163700.1</a> | F-5'-tggctgaatgtatgtatacaggttt-3'<br>R-5'-cagcgtgtgcttcacattt-3'   |
